# Supplementary material
Source: MDPI journal article supplement (https://www.mdpi.com/1424-8247/14/9/852)

# Doxycycline Attenuates Cancer Cell Growth by Suppressing NLRP3 Mediated Inflammation

## Supplementary Files:

**Table S1:** The effect of Doxycycline on mRNA expression of *NLRP3* and downstream genes.

| mRNA      | Comparisons | PC3             |            |        |                  |             | A549            |            |      |                  |             |        |
|-----------|-------------|-----------------|------------|--------|------------------|-------------|-----------------|------------|------|------------------|-------------|--------|
|           |             | Mean Difference | Std. Error | p*     | Lower Bound      | Upper Bound | Mean Difference | Std. Error | p*   | Lower Bound      | Upper Bound |        |
| NLRP3     | U           | G               | -0.18      | 7.36   | 1.000            | -24.89      | 24.53           | -0.01      | 1.37 | 1.000            | -4.62       | 4.60   |
|           |             | L               | -15.50     | 7.36   | 0.345            | -40.22      | 9.21            | -7.18      | 1.37 | <b>0.002</b>     | -11.79      | -2.57  |
|           |             | LN              | -57.46     | 7.36   | <b>&lt;0.001</b> | -82.17      | -32.74          | -13.77     | 1.37 | <b>&lt;0.001</b> | -18.38      | -9.16  |
|           |             | D               | -31.33     | 7.36   | <b>0.011</b>     | -56.04      | -6.62           | -2.15      | 1.37 | 0.631            | -6.76       | 2.45   |
|           |             | LD              | -22.35     | 7.36   | 0.085            | -47.07      | 2.36            | 0.04       | 1.37 | 1.000            | -4.56       | 4.65   |
|           | G           | L               | -15.32     | 7.36   | 0.356            | -40.04      | 9.39            | -7.17      | 1.37 | <b>0.002</b>     | -11.78      | -2.56  |
|           |             | LN              | -57.28     | 7.36   | <b>&lt;0.001</b> | -81.99      | -32.56          | -13.76     | 1.37 | <b>&lt;0.001</b> | -18.37      | -9.15  |
|           |             | D               | -31.15     | 7.36   | <b>0.011</b>     | -55.86      | -6.44           | -2.15      | 1.37 | 0.634            | -6.75       | 2.46   |
|           |             | LD              | -22.17     | 7.36   | 0.089            | -46.89      | 2.54            | 0.05       | 1.37 | 1.000            | -4.56       | 4.66   |
|           | L           | LN              | -41.95     | 7.36   | <b>0.001</b>     | -66.01      | -17.24          | -6.59      | 1.37 | <b>0.004</b>     | -11.19      | -1.98  |
|           |             | D               | -15.83     | 7.36   | 0.326            | -40.54      | 8.89            | 5.03       | 1.37 | <b>0.030</b>     | 0.42        | 9.63   |
|           |             | LD              | -6.85      | 7.36   | 0.931            | -31.56      | 17.86           | 7.22       | 1.37 | <b>0.002</b>     | 2.62        | 11.83  |
|           | LN          | D               | 26.13      | 7.36   | <b>0.036</b>     | 1.41        | 50.84           | 11.61      | 1.37 | <b>&lt;0.001</b> | 7.01        | 16.22  |
|           |             | LD              | 35.10      | 7.36   | <b>0.005</b>     | 10.39       | 59.82           | 13.81      | 1.37 | <b>&lt;0.001</b> | 9.20        | 18.42  |
| Pro-CASP1 | U           | G               | -0.46      | 376.48 | 1.000            | -131.06     | 121855.00       | -0.33      | 2.55 | 1.000            | -8.90       | 8.23   |
|           |             | L               | -11.45     | 376.48 | 0.085            | -240.96     | 11955.00        | -10.75     | 2.55 | <b>0.012</b>     | -19.32      | -2.18  |
|           |             | LN              | -23.50     | 376.48 | <b>&lt;0.001</b> | -361.42     | -108511.00      | -12.65     | 2.55 | <b>0.003</b>     | -21.22      | -4.08  |
|           |             | D               | -23.53     | 376.48 | <b>&lt;0.001</b> | -361.76     | -108845.00      | -1.24      | 2.55 | 0.996            | -9.81       | 7.33   |
|           |             | LD              | -18.58     | 376.48 | <b>0.004</b>     | -312.26     | -59345.00       | -0.04      | 2.55 | 1.000            | -8.61       | 8.53   |
|           | G           | L               | -10.99     | 376.48 | 0.103            | -23.64      | 16.56           | -10.41     | 2.55 | <b>0.015</b>     | -18.98      | -1.85  |
|           |             | LN              | -23.04     | 376.48 | <b>0.001</b>     | -356.82     | -103911.00      | -12.32     | 2.55 | <b>0.004</b>     | -20.88      | -3.75  |
|           |             | D               | -23.07     | 376.48 | <b>0.001</b>     | -35.72      | -10.42          | -0.90      | 2.55 | 0.999            | -9.47       | 7.67   |
|           |             | LD              | -18.12     | 376.48 | <b>0.004</b>     | -30.77      | -5.47           | 0.30       | 2.55 | 1.000            | -8.27       | 8.87   |
|           | L           | LN              | -12.05     | 376.48 | 0.065            | -24.69      | 0.60            | -1.90      | 2.55 | 0.972            | -10.47      | 6.67   |
|           |             | D               | -12.08     | 376.48 | 0.064            | -24.73      | 0.57            | 9.51       | 2.55 | <b>0.027</b>     | 0.94        | 18.08  |
|           |             | LD              | -7.13      | 376.48 | 0.450            | -19.78      | 55.16           | 10.71      | 2.55 | <b>0.012</b>     | 2.14        | 19.28  |
|           | LN          | D               | -0.03      | 376.48 | 1.000            | -12.68      | 126.12          | 11.41      | 2.55 | <b>0.008</b>     | 2.84        | 19.98  |
|           |             | LD              | 4.92       | 376.48 | 0.777            | -7.73       | 175.62          | 12.61      | 2.55 | <b>0.004</b>     | 4.04        | 21.18  |
| Pro-IL18  | U           | G               | 0.05       | 1.17   | 1.000            | -3.87       | 3.97            | 0.53       | 5.76 | 1.000            | -18.80      | 19.86  |
|           |             | L               | -7.20      | 1.17   | <b>0.001</b>     | -11.12      | -3.28           | -3.03      | 5.76 | 0.994            | -22.36      | 16.31  |
|           |             | LN              | -14.97     | 1.17   | <b>&lt;0.001</b> | -18.89      | -11.05          | -7.48      | 5.76 | 0.780            | -26.81      | 11.86  |
|           |             | D               | -1.30      | 1.17   | 0.867            | -5.22       | 2.62            | -9.38000-  | 5.76 | 0.596            | -28.71      | 9.95   |
|           |             | LD              | -2.64      | 1.17   | 0.280            | -6.56       | 1.28            | -44.92     | 5.76 | <b>&lt;0.001</b> | -64.25      | -25.58 |
|           | G           | L               | -7.25      | 1.17   | <b>&lt;0.001</b> | -11.17      | -3.33           | -3.56      | 5.76 | 0.987            | -22.89      | 15.78  |
|           |             | LN              | -15.02     | 1.17   | <b>&lt;0.001</b> | -18.94      | -11.10          | -8.01      | 5.76 | 0.732            | -27.34      | 11.33  |
|           |             | D               | -1.35      | 1.17   | 0.850            | -5.27       | 2.57            | -9.91      | 5.76 | 0.544            | -29.24      | 9.42   |
|           |             | LD              | -2.69      | 1.17   | 0.265            | -6.61       | 1.23            | -45.45     | 5.76 | <b>&lt;0.001</b> | -64.78      | -26.11 |
|           | L           | LN              | -7.77      | 1.17   | <b>&lt;0.001</b> | -11.69      | -3.85           | -4.45      | 5.76 | 0.967            | -23.78      | 14.88  |
|           |             | D               | 5.90       | 1.17   | <b>0.003</b>     | 1.98        | 9.82            | -6.35      | 5.76 | 0.871            | -25.69      | 12.98  |
|           |             | LD              | 4.56       | 1.17   | <b>0.020</b>     | 0.64        | 8.48            | -41.89     | 5.76 | <b>&lt;0.001</b> | -61.22      | -22.56 |
|           | LN          | D               | 13.67      | 1.17   | <b>&lt;0.001</b> | 9.75        | 17.59           | -1.90      | 5.76 | 0.999            | -21.24      | 17.43  |
|           |             | LD              | 12.33      | 1.17   | <b>&lt;0.001</b> | 8.41        | 16.25           | -37.44     | 5.76 | <b>&lt;0.001</b> | -56.77      | -18.11 |

\*P-value calculated using One Way Anova and Tukey Test. P values less than 0.05 were considered significant and showed in bold. U: Untreated, G: Glibenclamide, L: LPS, LN: LPS-Nigericin, D: Doxycycline, LD: LPS-Doxycycline, n=3.

**Table S2:** The effect of Doxycycline mediated NLRP3 suppression on the early phase of apoptosis.

|      |   |    | Mean Difference | Std. Error | P*               | 95% CI      |             |
|------|---|----|-----------------|------------|------------------|-------------|-------------|
|      |   |    |                 |            |                  | Lower Bound | Upper Bound |
| PC3  | U | L  | -0.23           | 3.40       | 1.000            | -11.13      | 10.66       |
|      |   | D  | -43.97          | 3.40       | <b>&lt;0.001</b> | -54.86      | -33.07      |
|      |   | LD | -74.33          | 3.40       | <b>&lt;0.001</b> | -85.23      | -63.44      |
|      | L | D  | -43.73          | 3.40       | <b>&lt;0.001</b> | -54.63      | -32.84      |
|      |   | LD | -74.10          | 3.40       | <b>&lt;0.001</b> | -85.00      | -63.20      |
|      | D | LD | -30.37          | 3.40       | <b>&lt;0.001</b> | -41.26      | -19.47      |
| A549 | U | L  | 2.23            | 2.55       | 0.817            | -5.92       | 10.39       |
|      |   | D  | -43.97          | 2.55       | <b>&lt;0.001</b> | -52.12      | -35.81      |
|      |   | LD | -49.60          | 2.55       | <b>&lt;0.001</b> | -57.76      | -41.44      |
|      | L | D  | -46.20          | 2.55       | <b>&lt;0.001</b> | -54.36      | -38.04      |
|      |   | LD | -51.83          | 2.55       | <b>&lt;0.001</b> | -59.99      | -43.68      |
|      | D | LD | -5.63           | 2.55       | 0.200            | -13.79      | 2.52        |

\*P-value calculated using One Way Anova and Tukey Test. P values less than 0.05 were considered significant and showed in bold. **U**: Untreated, **L**: LPS, **D**: Doxycycline, **LD**: LPS-Doxycycline, n=3.

**Table S3:** The effect of Doxycycline on cytokine releasing pattern of PC3 cells.

| pg/mL       | 24h    |        |        |        |        |        | 48h    |        |        |        |        |        |
|-------------|--------|--------|--------|--------|--------|--------|--------|--------|--------|--------|--------|--------|
|             | U      | G      | L      | LN     | D      | LD     | U      | G      | L      | LN     | D      | LD     |
| EGF         | 8.92   | 6.09   | 6.82   | 16.11  | 7.17   | 6.59   | 12.58  | 11.16  | 10.41  | 13.75  | 7.52   | 3.12   |
| FGF-2       | 68.97  | <1.46↓ | 49.43  | 788.49 | <1.46↓ | <1.46↓ | 87.07  | 41.36  | 78.03  | 152.86 | 70.86  | 49.43  |
| Eotaxin     | <2.27↓ | <2.27↓ | <2.27↓ | <2.27↓ | 2.57   | <2.27↓ | <2.27↓ | 3.43   | <2.27↓ | <2.27↓ | <2.27↓ | <2.27↓ |
| TGF-a       | 6.72   | 9.78   | 6.33   | 11.6   | 6.72   | 5.54   | 10.29  | 14.99  | 13.26  | 11.96  | 5.98   | 4.46   |
| G-CSF       | 16534  | 16435  | 15394  | 3220   | 1865   | 7406   | >18601 | >18601 | >18601 | 3576   | 3749   | 3130   |
| Flt-3L      | <2.49↓ | <2.49↓ | <2.49↓ | <2.49↓ | <2.49↓ | <2.49↓ | ↑      | ↑      | ↑      | <2.49↓ | <2.49↓ | <2.49↓ |
| GM-CSF      | 3370   | 4352   | 3597   | 880.79 | 2712   | 2720   | 5072   | 6754   | 6198   | 920.85 | 3657   | 3072   |
| Fractalkine | 75.66  | 89.5   | 75.66  | 3.09   | 155.94 | 55.82  | 75.66  | 150.68 | 78.52  | 43.85  | 118.3  | 89.5   |
| IFNα2       | 15.42  | 43.95  | 20.36  | 2.58   | 21.18  | 25.29  | 15.42  | 15.42  | 36.69  | 4.87   | 4.09   | <1.71↓ |
| IFN-γ       | <1.51↓ | <1.51↓ | <1.51↓ | <1.51↓ | <1.51↓ | <1.51↓ | <1.51↓ | <1.51↓ | <1.51↓ | <1.51↓ | <1.51↓ | <1.51↓ |
| GRO         | >11613 | >11613 | >11613 | >11613 | >11613 | >11613 | >11613 | >11613 | >11613 | >11613 | >11613 | >11613 |
| IL-10       | NAN    |
| MCP-3       | <1.82↓ | <1.82↓ | <1.82↓ | <1.82↓ | <1.82↓ | <1.82↓ | <1.82↓ | <1.82↓ | <1.82↓ | <1.82↓ | <1.82↓ | <1.82↓ |
| IL12p40     | <1.77↓ | <1.77↓ | <1.77↓ | <1.77↓ | <1.77↓ | <1.77↓ | <1.77↓ | <1.77↓ | <1.77↓ | <1.77↓ | <1.77↓ | <1.77↓ |
| MDC         | <0.82↓ | <0.82↓ | 1.08   | <0.82↓ | <0.82↓ | 2.53   | 7.4    | 11.43  | 2.53   | <0.82↓ | <0.82↓ | <0.82↓ |
| IL12p70     | NAN    |
| PDGF-AA     | 16.57  | 26.6   | 16.09  | <1.71↓ | 18.26  | 6.55   | 45.22  | 84.52  | 61.21  | <1.71↓ | 15.08  | 21.83  |
| IL-13       | <1.56↓ | <1.56↓ | <1.56↓ | <1.56↓ | <1.56↓ | <1.56↓ | <1.56↓ | <1.56↓ | <1.56↓ | <1.56↓ | <1.56↓ | <1.56↓ |
| PDGF-AB/BB  | <16.00 | <16.00 | <16.00 | <16.00 | <16.00 | <16.00 | <16.00 | <16.00 | <16.00 | <16.00 | <16.00 | <16.00 |
| IL-15       | 2.84   | 3.06   | 2.73   | <1.30↓ | 3.86   | 2.84   | 8.35   | 10.74  | 10.61  | <1.30↓ | 5.5    | 3.4    |
| sCD40L      | <1.92↓ | <1.92↓ | <1.92↓ | <1.92↓ | <1.92↓ | <1.92↓ | <1.92↓ | 2.85   | <1.92↓ | <1.92↓ | <1.92↓ | <1.92↓ |
| IL-17A      | <1.70↓ | <1.70↓ | <1.70↓ | <1.70↓ | <1.70↓ | <1.70↓ | <1.70↓ | <1.70↓ | <1.70↓ | <1.70↓ | <1.70↓ | <1.70↓ |
| IL1Ra       | <3.98↓ | <3.98↓ | <3.98↓ | <3.98↓ | <3.98↓ | <3.98↓ | <3.98↓ | <3.98↓ | <3.98↓ | <3.98↓ | <3.98↓ | <3.98↓ |
| IL1a        | 14.25  | 17.16  | 23.05  | 372.39 | 29.67  | 8.59   | 61.44  | 25.26  | 64.13  | 435.38 | 78.61  | 28.94  |
| IL-9        | 15.34  | 8.98   | 9.8    | 42.33  | 13.98  | 6.36   | 20.3   | 17.35  | 18.76  | 34.26  | 11.15  | 5.67   |
| IL-1b       | <1.40↓ | <1.40↓ | <1.40↓ | 9.28   | 1.83   | <1.40↓ | 5.43   | 3.76   | 5.88   | 2.05   | 4.67   | 3.39   |
| IL-2        | <1.57↓ | <1.57↓ | <1.57↓ | <1.57↓ | <1.57↓ | <1.57↓ | <1.57↓ | <1.57↓ | <1.57↓ | <1.57↓ | <1.57↓ | <1.57↓ |
| IL-3        | <1.53↓ | <1.53↓ | <1.53↓ | <1.53↓ | <1.53↓ | <1.53↓ | <1.53↓ | <1.53↓ | <1.53↓ | <1.53↓ | <1.53↓ | <1.53↓ |
| IL-4        | 20.21  | 16.07  | 17.1   | 12.69  | 18.13  | 17.44  | 21.61  | 20.21  | 20.21  | 13.36  | 14.04  | 11.36  |
| IL-5        | <2.00↓ | <2.00↓ | <2.00↓ | <2.00↓ | <2.00↓ | <2.00↓ | <2.00↓ | <2.00↓ | <2.00↓ | <2.00↓ | <2.00↓ | <2.00↓ |
| IL-6        | 10.07  | 16.08  | 8.72   | 6.01   | 18.87  | 6.67   | 18.72  | 41.73  | 21.34  | 6.6    | 32.6   | 32     |
| IL-7        | <1.84↓ | <1.84↓ | <1.84↓ | <1.84↓ | <1.84↓ | <1.84↓ | <1.84↓ | <1.84↓ | <1.84↓ | <1.84↓ | <1.84↓ | <1.84↓ |
| IL-8        | >7775↑ | >7775↑ | >7775↑ | 6395   | >7775↑ | >7775↑ | >7775↑ | >7775↑ | >7775↑ | 7634   | >7775↑ | >7775↑ |
| IP10        | 49.87  | 21.93  | 22.19  | 20.88  | 49.78  | 26.71  | 103.47 | 26.46  | 80.98  | 12.99  | 24.73  | 18.46  |
| MCP-1       | 801.21 | 406.41 | 736.66 | 120.1  | 329.1  | 258.37 | 2042   | 639.97 | 1799   | 129.41 | 168.14 | 204.74 |
| MIP-1a      | <2.12↓ | <2.12↓ | <2.12↓ | <2.12↓ | <2.12↓ | <2.12↓ | <2.12↓ | 2.29   | <2.12↓ | <2.12↓ | <2.12↓ | <2.12↓ |
| MIP-1b      | <1.79↓ | <1.79↓ | <1.79↓ | 4.17   | <1.79↓ | <1.79↓ | <1.79↓ | 2.98   | <1.79↓ | <1.79↓ | <1.79↓ | <1.79↓ |
| Rantes      | <6.13↓ | <6.13↓ | <6.13↓ | <6.13↓ | <6.13↓ | <6.13↓ | <6.13↓ | <6.13↓ | <6.13↓ | <6.13↓ | <6.13↓ | <6.13↓ |
| TNFα        | 41.43  | 51.09  | 40.38  | 32.74  | 24.49  | 13.46  | 115.28 | 148.35 | 122.09 | 19.46  | 68.68  | 64.97  |
| TNF-b       | <1.93↓ | <1.93↓ | <1.93↓ | <1.93↓ | <1.93↓ | <1.93↓ | <1.93↓ | <1.93↓ | <1.93↓ | <1.93↓ | <1.93↓ | <1.93↓ |
| VEGF        | 63.34  | 169.58 | 60.19  | 23.72  | 73.68  | 54.82  | 195.92 | 460.01 | 194.04 | 23.72  | 160.3  | 132.8  |
|             | 72h    |        |        |        |        |        | 96 h   |        |        |        |        |        |
|             | U      | G      | L      | LN     | D      | LD     | U      | G      | L      | LN     | D      | LD     |
| EGF         | 10.22  | 14.08  | 8.5    | 10.5   | 6.09   | 3.91   | 10.88  | 9.63   | 13.92  | 6.09   | 2.61   | 9.43   |
| FGF-2       | 214.37 | 83.88  | 305.16 | 35.21  | 303.28 | 230.27 | 1156   | 246.54 | 658.74 | <1.46↓ | 389.07 | 266.91 |
| Eotaxin     | 2.33   | 2.57   | <2.27↓ | <2.27↓ | <2.27↓ | <2.27↓ | <2.27↓ | <2.27↓ | <2.27↓ | <2.27↓ | <2.27↓ | <2.27↓ |
| TGF-a       | 10.03  | 25.54  | 8.46   | 10.18  | 11.19  | 7.08   | 14.61  | 23.33  | 10.09  | 9.85   | 8.62   | 8.25   |
| G-CSF       | >18601 | >18601 | >18601 | 2312   | 6741   | 2261   | >18601 | 15627  | >18601 | 2475   | 784.9  | 5606   |
| Flt-3L      | <2.49↓ | <2.49↓ | <2.49↓ | <2.49↓ | <2.49↓ | <2.49↓ | <2.49↓ | <2.49↓ | <2.49↓ | <2.49↓ | <2.49↓ | <2.49↓ |
| GM-CSF      | 4885   | 8890   | 4193   | 738.56 | 4836   | 3678   | 7420   | 7204   | 5751   | 697.65 | 2790   | 4000   |
| Fractalkine | 43.85  | 54.18  | 43.85  | 40.19  | 57.44  | 40.19  | 43.85  | 34.46  | 24     | <2.01↓ | 34.46  | 68.33  |
| IFNα2       | 20.36  | 39.93  | 12.95  | 2.58   | 7.25   | 5.65   | 36.69  | 17.07  | 23.64  | 7.25   | <1.71↓ | <1.71↓ |
| IFN-γ       | <1.51↓ | <1.51↓ | <1.51↓ | <1.51↓ | <1.51↓ | <1.51↓ | <1.51↓ | <1.51↓ | <1.51↓ | <1.51↓ | <1.51↓ | <1.51↓ |
| GRO         | >11613 | >11613 | >11613 | >11613 | >11613 | >11613 | >11613 | >11613 | >11613 | >11613 | >11613 | >11613 |
| IL-10       | NAN    |
| MCP-3       | <1.82↓ | <1.82↓ | <1.82↓ | <1.82↓ | <1.82↓ | <1.82↓ | <1.82↓ | <1.82↓ | <1.82↓ | <1.82↓ | <1.82↓ | <1.82↓ |
| IL12p40     | <1.77↓ | <1.77↓ | <1.77↓ | <1.77↓ | <1.77↓ | <1.77↓ | <1.77↓ | <1.77↓ | <1.77↓ | <1.77↓ | <1.77↓ | <1.77↓ |
| MDC         | 2.53   | 4.5    | 5.11   | <0.82↓ | <0.82↓ | <0.82↓ | 8.46   | <0.82↓ | 1.08   | <0.82↓ | <0.82↓ | <0.82↓ |
| IL12p70     | NAN    |
| PDGF-AA     | 37.27  | 169.56 | 37.21  | <1.71↓ | 27.97  | 5.71   | 80.88  | 143.11 | 73.97  | <1.71↓ | 31.31  | 30.73  |

|            |         |         |         |         |         |         |         |         |         |         |         |         |
|------------|---------|---------|---------|---------|---------|---------|---------|---------|---------|---------|---------|---------|
| IL-13      | <1.56↓  | <1.56↓  | <1.56↓  | <1.56↓  | <1.56↓  | <1.56↓  | <1.56↓  | <1.56↓  | <1.56↓  | <1.56↓  | <1.56↓  | <1.56↓  |
| PDGF-AB/BB | <16.00↓ | <16.00↓ | <16.00↓ | <16.00↓ | <16.00↓ | <16.00↓ | <16.00↓ | <16.00↓ | <16.00↓ | <16.00↓ | <16.00↓ | <16.00↓ |
| IL-15      | 7.8     | 20.76   | 7.12    | <1.30↓  | 10.42   | 7.19    | 16.35   | 17.22   | 13.58   | <1.30↓  | 5.14    | 7.19    |
| sCD40L     | <1.92↓  | <1.92↓  | <1.92↓  | <1.92↓  | <1.92↓  | <1.92↓  | <1.92↓  | <1.92↓  | <1.92↓  | <1.92↓  | <1.92↓  | <1.92↓  |
| IL-17A     | <1.70↓  | <1.70↓  | <1.70↓  | <1.70↓  | <1.70↓  | <1.70↓  | <1.70↓  | <1.70↓  | <1.70↓  | <1.70↓  | <1.70↓  | <1.70↓  |
| IL1Ra      | <3.98↓  | <3.98↓  | <3.98↓  | <3.98↓  | <3.98↓  | <3.98↓  | <3.98↓  | <3.98↓  | <3.98↓  | <3.98↓  | <3.98↓  | <3.98↓  |
| IL1a       | 131.61  | 187.7   | 499.46  | 258.97  | 388.97  | 415.29  | 848.72  | 279.57  | 500.54  | 312.46  | 589.55  | 447.71  |
| IL-9       | 14.45   | 13.57   | 15.87   | 36.6    | 11.59   | 6.79    | 21.19   | 10.68   | 19.89   | 13.01   | 10.27   | 11.83   |
| IL-1b      | 6.95    | 12.85   | 15.01   | <1.40↓  | 26.7    | 20.55   | 95.38   | 41.36   | 30.6    | <1.40↓  | 42.13   | 21.64   |
| IL-2       | <1.57↓  | <1.57↓  | <1.57↓  | <1.57↓  | <1.57↓  | <1.57↓  | <1.57↓  | <1.57↓  | <1.57↓  | <1.57↓  | <1.57↓  | <1.57↓  |
| IL-3       | <1.53↓  | <1.53↓  | <1.53↓  | <1.53↓  | <1.53↓  | <1.53↓  | <1.53↓  | <1.53↓  | <1.53↓  | <1.53↓  | <1.53↓  | <1.53↓  |
| IL-4       | 20.91   | 23.01   | 18.13   | 11.03   | 14.71   | 15.39   | 20.91   | 13.36   | 16.07   | 10.71   | 10.05   | 10.71   |
| IL-5       | <2.00↓  | <2.00↓  | <2.00↓  | <2.00↓  | <2.00↓  | <2.00↓  | <2.00↓  | <2.00↓  | <2.00↓  | <2.00↓  | <2.00↓  | <2.00↓  |
| IL-6       | 22.92   | 108.22  | 40.66   | <1.82↓  | 110.21  | 62.3    | 174.78  | 125.04  | 101.87  | <1.82↓  | 123.65  | 57.01   |
| IL-7       | <1.84↓  | 2.45    | <1.84↓  | <1.84↓  | 2.2     | <1.84↓  | <1.84↓  | <1.84↓  | <1.84↓  | <1.84↓  | <1.84↓  | <1.84↓  |
| IL-8       | >7775↑  | >7775↑  | >7775↑  | 5772    | >7775↑  | >7775↑  | >7775↑  | >7775↑  | >7775↑  | 5794    | >7775↑  | >7775↑  |
| IP10       | 56.93   | 55.81   | 189.54  | 13.59   | 56.84   | 22.7    | 353.53  | 55.15   | 293.85  | 13.59   | 50.36   | 70.22   |
| MCP-1      | 925.58  | 767.53  | 1473    | 81.47   | 656.81  | 126.04  | 3454    | 792.33  | 2138    | 88.95   | 316.61  | 701.96  |
| MIP-1a     | <2.12↓  | <2.12↓  | <2.12↓  | <2.12↓  | <2.12↓  | <2.12↓  | <2.12↓  | <2.12↓  | <2.12↓  | <2.12↓  | <2.12↓  | <2.12↓  |
| MIP-1b     | <1.79↓  | 5.29    | <1.79↓  | <1.79↓  | <1.79↓  | <1.79↓  | 8.39    | <1.79↓  | <1.79↓  | <1.79↓  | <1.79↓  | <1.79↓  |
| Rantes     | <6.13↓  | <6.13↓  | <6.13↓  | <6.13↓  | <6.13↓  | <6.13↓  | <6.13↓  | <6.13↓  | <6.13↓  | <6.13↓  | <6.13↓  | <6.13↓  |
| TNFa       | 120.47  | 262.66  | 208.17  | 16.53   | 117.06  | 76.92   | 337.13  | 340.85  | 348.8   | 9.73    | 58.84   | 67.39   |
| TNF-b      | <1.93↓  | <1.93↓  | <1.93↓  | <1.93↓  | <1.93↓  | <1.93↓  | <1.93↓  | <1.93↓  | <1.93↓  | <1.93↓  | <1.93↓  | <1.93↓  |
| VEGF       | 173.83  | 917.85  | 338.19  | 3.3     | 331.52  | 163.4   | 418.91  | 613.82  | 439.61  | 6.27    | 132.32  | 217.48  |

**Table S4:** The effect of Doxycycline on cytokine releasing pattern of A549 cells.

|              | 24h     |         |         |         |         |         | 48h     |         |         |         |         |         |
|--------------|---------|---------|---------|---------|---------|---------|---------|---------|---------|---------|---------|---------|
|              | U       | G       | L       | LN      | D       | LD      | U       | G       | L       | LN      | D       | LD      |
| EGF          | 4.78    | 2.25    | 3.6     | <2.22↓  | 2.61    | <2.22↓  | 4.78    | 13.75   | 3.28    | 3.44    | <2.22↓  | <2.22↓  |
| FGF-2        | 144.76  | 86.28   | 221.28  | 3527    | 7.91    | <1.46↓  | 326.95  | 311.38  | 264.88  | 848.85  | 93.91   | 124.48  |
| Eotaxin      | <2.27↓  | <2.27↓  | <2.27↓  | <2.27↓  | <2.27↓  | <2.27↓  | <2.27↓  | N/A     | <2.27↓  | <2.27↓  | <2.27↓  | <2.27↓  |
| TGF-a        | <1.63↓  | <1.63↓  | <1.63↓  | 3.49    | <1.63↓  | <1.63↓  | <1.63↓  | <1.63↓  | <1.63↓  | 3.62    | <1.63↓  | <1.63↓  |
| G-CSF        | 143.8   | 169.2   | 173.47  | 49.3    | 42.03   | 38.05   | 390.74  | 241.93  | 366.93  | 97.09   | 65.54   | 54.8    |
| Flt-3L       | <2.49↓  | <2.49↓  | <2.49↓  | <2.49↓  | <2.49↓  | <2.49↓  | <2.49↓  | 8.76    | <2.49↓  | <2.49↓  | <2.49↓  | <2.49↓  |
| GM-CSF       | 42.82   | 46.79   | 41.5    | 15.49   | 21.73   | 14.31   | 62.14   | 35.84   | 61      | 16.68   | 32.84   | 24.83   |
| Fractalkin e | 97.37   | 47.39   | 50.83   | 36.41   | 11.76   | <2.01↓  | 50.83   | 3.09    | 57.44   | 21.73   | 32.46   | 54.18   |
| IFNa2        | 14.6    | 15.42   | 18.71   | 18.71   | 18.71   | 22      | 17.89   | N/A     | 25.29   | 10.5    | 15.42   | 8.87    |
| IFN-γ        | <1.51↓  | <1.51↓  | <1.51↓  | <1.51↓  | <1.51↓  | <1.51↓  | <1.51↓  | <1.51↓  | <1.51↓  | <1.51↓  | <1.51↓  | <1.51↓  |
| GRO          | >11613↑ | >11613↑ | >11613↑ | 1161    | 603.09  | 626.43  | >11613↑ | 10944   | >11613↑ | 1028    | 1856    | 1963    |
| IL-10        | NAN     | N/A     | NAN     | NAN     | NAN     | NAN     |
| MCP-3        | <1.82↓  | <1.82↓  | <1.82↓  | <1.82↓  | <1.82↓  | <1.82↓  | <1.82↓  | <1.82↓  | <1.82↓  | <1.82↓  | <1.82↓  | <1.82↓  |
| IL12p40      | <1.77↓  | <1.77↓  | <1.77↓  | <1.77↓  | <1.77↓  | <1.77↓  | <1.77↓  | <1.77↓  | <1.77↓  | <1.77↓  | <1.77↓  | <1.77↓  |
| MDC          | <0.82↓  | <0.82↓  | 3.87    | <0.82↓  | <0.82↓  | <0.82↓  | 3.87    | 8.46    | 7.4     | <0.82↓  | <0.82↓  | <0.82↓  |
| IL12p70      | NAN     | N/A     | NAN     | NAN     | NAN     | NAN     |
| PDGF-AA      | 591.57  | 541.38  | 684.61  | 115.97  | 226.27  | 219.62  | 1651    | 487.4   | 1200    | 153.51  | 453.86  | 450.62  |
| IL-13        | <1.56↓  | <1.56↓  | <1.56↓  | <1.56↓  | <1.56↓  | <1.56↓  | <1.56↓  | 17.77   | <1.56↓  | <1.56↓  | <1.56↓  | <1.56↓  |
| PDGF-AB/BB   | <16.00↓ | <16.00↓ | <16.00↓ | <16.00↓ | <16.00↓ | <16.00↓ | <16.00↓ | <16.00↓ | <16.00↓ | <16.00↓ | <16.00↓ | <16.00↓ |
| IL-15        | 2.06    | 2.95    | 2.73    | <1.30↓  | 2.5     | 1.31    | 8.17    | 3.97    | 5.26    | <1.30↓  | 3.97    | 2.95    |
| sCD40L       | <1.92↓  | <1.92↓  | <1.92↓  | <1.92↓  | <1.92↓  | <1.92↓  | <1.92↓  | <1.92↓  | <1.92↓  | <1.92↓  | <1.92↓  | <1.92↓  |
| IL-17A       | <1.70↓  | <1.70↓  | <1.70↓  | <1.70↓  | <1.70↓  | <1.70↓  | <1.70↓  | <1.70↓  | <1.70↓  | <1.70↓  | <1.70↓  | <1.70↓  |
| IL1Ra        | <3.98↓  | <3.98↓  | <3.98↓  | <3.98↓  | <3.98↓  | <3.98↓  | <3.98↓  | N/A     | <3.98↓  | <3.98↓  | <3.98↓  | <3.98↓  |
| IL1a         | <1.55↓  | <1.55↓  | 8.59    | <1.55↓  | <1.55↓  | <1.55↓  | <1.55↓  | <1.55↓  | <1.55↓  | <1.55↓  | <1.55↓  | <1.55↓  |
| IL-9         | 7.17    | 2.31    | 5.84    | <1.67↓  | 3.44    | 2.6     | 9.36    | <1.67↓  | 5.73    | 7.4     | 4.92    | 4.47    |
| IL-1b        | <1.40↓  | <1.40↓  | <1.40↓  | <1.40↓  | <1.40↓  | <1.40↓  | <1.40↓  | 1106    | <1.40↓  | <1.40↓  | <1.40↓  | <1.40↓  |
| IL-2         | <1.57↓  | <1.57↓  | <1.57↓  | <1.57↓  | <1.57↓  | <1.57↓  | <1.57↓  | <1.57↓  | <1.57↓  | <1.57↓  | <1.57↓  | <1.57↓  |
| IL-3         | <1.53↓  | <1.53↓  | <1.53↓  | <1.53↓  | <1.53↓  | <1.53↓  | <1.53↓  | N/A     | <1.53↓  | <1.53↓  | <1.53↓  | <1.53↓  |
| IL-4         | 10.71   | 12.69   | 15.05   | <2.03↓  | <2.03↓  | <2.03↓  | 15.73   | 12.36   | 14.37   | <2.03↓  | <2.03↓  | <2.03↓  |
| IL-5         | <2.00↓  | <2.00↓  | <2.00↓  | <2.00↓  | <2.00↓  | <2.00↓  | <2.00↓  | <2.00↓  | <2.00↓  | <2.00↓  | <2.00↓  | <2.00↓  |
| IL-6         | 27.41   | 25.19   | 32.09   | <1.82↓  | 9.3     | 6.1     | 104.25  | 40.42   | 89.86   | <1.82↓  | 42.64   | 35.95   |
| IL-7         | <1.84↓  | <1.84↓  | <1.84↓  | <1.84↓  | <1.84↓  | <1.84↓  | <1.84↓  | 4.78    | <1.84↓  | <1.84↓  | <1.84↓  | <1.84↓  |
| IL-8         | 2437    | 2771    | 3135    | 261.27  | 669.31  | 513.44  | 7144    | 3677    | 6551    | 235.02  | 2017    | 2033    |
| IP10         | 21.41   | 18.18   | 26.46   | 4.43    | 5.5     | 5.32    | 53.73   | N/A     | 38.76   | 2.27    | 9.55    | 6.19    |

|                 |             |             |             |        |             |            |             |             |             |        |            |             |
|-----------------|-------------|-------------|-------------|--------|-------------|------------|-------------|-------------|-------------|--------|------------|-------------|
| MCP-1           | 5687        | >7400↑      | 5682        | 1629   | 1158        | 1258       | 5678        | 3286        | 6344        | 2439   | 3874       | 2631        |
| MIP-1a          | <2.12↓      | <2.12↓      | <2.12↓      | <2.12↓ | <2.12↓      | <2.12↓     | <2.12↓      | 4.5         | <2.12↓      | <2.12↓ | <2.12↓     | <2.12↓      |
| MIP-1b          | <1.79↓      | <1.79↓      | <1.79↓      | <1.79↓ | <1.79↓      | <1.79↓     | <1.79↓      | <1.79↓      | <1.79↓      | <1.79↓ | <1.79↓     | <1.79↓      |
| Rantes          | <6.13↓      | <6.13↓      | <6.13↓      | <6.13↓ | <6.13↓      | <6.13↓     | <6.13↓      | <6.13↓      | <6.13↓      | <6.13↓ | <6.13↓     | <6.13↓      |
| TNFa            | <1.65↓      | <1.65↓      | 1.78        | <1.65↓ | <1.65↓      | <1.65↓     | 2.42        | <1.65↓      | 2.75        | <1.65↓ | <1.65↓     | <1.65↓      |
| TNF-b           | <1.93↓      | <1.93↓      | <1.93↓      | <1.93↓ | <1.93↓      | <1.93↓     | <1.93↓      | <1.93↓      | <1.93↓      | <1.93↓ | <1.93↓     | <1.93↓      |
| VEGF            | 430.16      | 781.35      | 554.29      | 94.61  | 351.07      | 271.05     | 1413        | 800.04      | 957.66      | 115.92 | 922.33     | 780.1       |
| 72h             |             |             |             |        |             |            | 96 h        |             |             |        |            |             |
|                 | U           | G           | L           | LN     | D           | LD         | U           | G           | L           | LN     | D          | LD          |
| EGF             | 3.28        | 2.61        | 4.87        | 3.92   | <2.22↓      | 3.14       | 6.7         | 5.52        | 5.09        | 4.64   | 3.14       | 3.14        |
| FGF-2           | 912.59      | 905.47      | 1350        | 167.29 | 626.92      | 470.52     | 1975        | 2061        | 1915        | 63.64  | 732.97     | 1227        |
| Eotaxin         | <2.27↓      | <2.27↓      | 3.18        | <2.22↓ | <2.27↓      | <2.22↓     | <2.22↓      | 2.94        | <2.22↓      | <2.22↓ | <2.22↓     | <2.22↓      |
| TGF-a           | 2.09        | 3.47        | <1.89↓      | 4.27   | <1.63↓      | <1.89↓     | <1.89↓      | 5.32        | <1.89↓      | 5.89   | <1.89↓     | 2.13        |
| G-CSF           | 295.3       | 618.91      | 757.02      | 92.02  | 60.21       | 96.35      | 1264        | 1329        | 1128        | 107.49 | 95.28      | 111.13      |
| Flt-3L          | <2.49↓      | <2.49↓      | <1.76↓      | <1.76↓ | <2.49↓      | <1.76↓     | <1.76↓      | <1.76↓      | <1.76↓      | <1.76↓ | <1.76↓     | <1.76↓      |
| GM-CSF          | 78.87       | 76.75       | 92.9        | 29.27  | 33.26       | 66.39      | 127.31      | 156.66      | 131.26      | 28.16  | 59.62      | 101.36      |
| Fractalkin<br>e | 32.46       | 19.39       | 28.13       | 6.3    | 19.39       | 25.05      | 59.4        | 59.4        | 37.14       | 37.14  | 31.17      | 40.06       |
| IFNa2           | 26.92       | 16.24       | 32.91       | 9.64   | 12.13       | 20.38      | 58.28       | 34.67       | 31.14       | 34.67  | 27.58      | 31.14       |
| IFN-y           | <1.51↓      | <1.51↓      | 2.12        | <1.66↓ | <1.51↓      | <1.66↓     | <1.66↓      | 2.12        | <1.66↓      | <1.66↓ | <1.66↓     | <1.66↓      |
| GRO             | >11613<br>↑ | >11613<br>↑ | >14776<br>↑ | 1134   | 2364        | 6987       | >14776<br>↑ | >14776<br>↑ | >14776<br>↑ | 1262   | 9187       | >14776<br>↑ |
| IL-10           | NAN         | NAN         | <1.06↓      | <1.06↓ | NAN         | <1.06↓     | <1.06↓      | <1.06↓      | <1.06↓      | <1.06↓ | <1.06↓     | <1.06↓      |
| MCP-3           | <1.82↓      | <1.82↓      | <1.86↓      | <1.86↓ | <1.82↓      | <1.86↓     | <1.86↓      | <1.86↓      | <1.86↓      | <1.86↓ | <1.86↓     | <1.86↓      |
| IL12p40         | <1.77↓      | <1.77↓      | <2.14↓      | <2.14↓ | <1.77↓      | <2.14↓     | <2.14↓      | <2.14↓      | <2.14↓      | <2.14↓ | <2.14↓     | <2.14↓      |
| MDC             | 5.11        | <0.82↓      | 7.42        | <1.64↓ | <0.82↓      | <1.64↓     | 9.33        | 6.42        | 11.6        | <1.64↓ | <1.64↓     | <1.64↓      |
| IL12p70         | NAN         | NAN         | <1.48↓      | <1.48↓ | NAN         | <1.48↓     | <1.48↓      | <1.48↓      | <1.48↓      | <1.48↓ | <1.48↓     | <1.48↓      |
| PDGF-AA         | 994.91      | 1112        | 2134        | 198.69 | 330.57      | 1038       | 4876        | 2432        | 4024        | 220.65 | 594.61     | 1422        |
| IL-13           | <1.56↓      | <1.56↓      | <1.20↓      | <1.20↓ | <1.56↓      | <1.20↓     | <1.20↓      | <1.20↓      | <1.20↓      | <1.20↓ | <1.20↓     | <1.20↓      |
| PDGF-<br>AB/BB  | <16.00<br>↓ | <16.00<br>↓ | <1.66↓      | <1.66↓ | <16.00<br>↓ | <1.66↓     | <1.66↓      | <1.66↓      | <1.66↓      | <1.66↓ | <1.66↓     | 167.07      |
| IL-15           | 4.79        | 6.7         | 14.29       | <1.73↓ | 3.74        | 12.88      | 25.34       | 25.98       | 23.98       | <1.73↓ | 13.23      | 17.4        |
| sCD40L          | <1.92↓      | <1.92↓      | 1.88        | <1.67↓ | <1.92↓      | <1.67↓     | <1.67↓      | 1.88        | <1.67↓      | <1.67↓ | <1.67↓     | <1.67↓      |
| IL-17A          | <1.70↓      | <1.70↓      | <2.02↓      | <2.02↓ | <1.70↓      | <2.02↓     | <2.02↓      | <2.02↓      | <2.02↓      | <2.02↓ | <2.02↓     | <2.02↓      |
| IL1Ra           | <3.98↓      | <3.98↓      | <1.72↓      | <1.72↓ | <3.98↓      | <1.72↓     | <1.72↓      | <1.72↓      | <1.72↓      | <1.72↓ | <1.72↓     | <1.72↓      |
| IL1a            | 3.51        | 3.51        | <1.62↓      | <1.62↓ | <1.55↓      | <1.62↓     | 47.04       | 90.19       | 30.75       | 17.08  | 3.47       | 22.26       |
| IL-9            | 8.63        | 4.27        | 4.56        | 7.66   | 4.02        | <2.11↓     | 10.71       | 3.27        | 3.98        | 10.3   | 4.19       | 2.51        |
| IL-1b           | <1.40↓      | <1.40↓      | <1.80↓      | <1.80↓ | <1.40↓      | <1.80↓     | <1.80↓      | <1.80↓      | <1.80↓      | <1.80↓ | <1.80↓     | <1.80↓      |
| IL-2            | <1.57↓      | <1.57↓      | <2.01↓      | <2.01↓ | <1.57↓      | <2.01↓     | <2.01↓      | <2.01↓      | <2.01↓      | <2.01↓ | <2.01↓     | <2.01↓      |
| IL-3            | <1.53↓      | <1.53↓      | <1.88↓      | <1.88↓ | <1.53↓      | <1.88↓     | <1.88↓      | <1.88↓      | <1.88↓      | <1.88↓ | <1.88↓     | <1.88↓      |
| IL-4            | 14.04       | 15.39       | 31.72       | <2.06↓ | <2.03↓      | 8.57       | 32.91       | 46.08       | 38.3        | <2.06↓ | 9.65       | 24.58       |
| IL-5            | <2.00↓      | <2.00↓      | <1.61↓      | <1.61↓ | <2.00↓      | <1.61↓     | <1.61↓      | <1.61↓      | <1.61↓      | <1.61↓ | <1.61↓     | <1.61↓      |
| IL-6            | 98.56       | 77.74       | 192.39      | 2.78   | 67.03       | 102.42     | 371.73      | 221         | 340.4       | <1.94↓ | 142.77     | 223.62      |
| IL-7            | <1.84↓      | <1.84↓      | <2.19↓      | <2.19↓ | <1.84↓      | <2.19↓     | <2.19↓      | 3.94        | <2.19↓      | <2.19↓ | <2.19↓     | <2.19↓      |
| IL-8            | 6674        | 6061        | >5739↑      | 321.68 | 3539        | >5739<br>↑ | >5739↑      | >5739↑      | >5739↑      | 368.51 | >5739<br>↑ | >5739↑      |
| IP10            | 21.41       | 20.62       | 56.98       | 3.37   | 10.51       | 12.83      | 63.93       | 30.74       | 82.64       | 5.53   | 13.38      | 15.91       |
| MCP-1           | 6491        | 7107        | >7382↑      | 2230   | 2166        | >7382<br>↑ | 6505        | >7382↑      | >7382↑      | 3464   | 6823       | >7382↑      |
| MIP-1a          | <2.12↓      | <2.12↓      | <1.96↓      | <1.96↓ | <2.12↓      | <1.96↓     | 2.26        | 2.7         | <1.96↓      | <1.96↓ | <1.96↓     | <1.96↓      |
| MIP-1b          | <1.79↓      | <1.79↓      | <1.72↓      | <1.72↓ | <1.79↓      | <1.72↓     | 3.32        | 6.92        | 5.18        | <1.72↓ | <1.72↓     | <1.72↓      |
| Rantes          | 26.23       | <6.13↓      | <2.71↓      | <2.71↓ | <6.13↓      | <2.71↓     | 139.77      | <2.71↓      | 153.11      | <2.71↓ | <2.71↓     | <2.71↓      |
| TNFa            | 2.69        | <1.65↓      | 3.89        | <1.61↓ | <1.65↓      | <1.61↓     | 4.42        | 4.77        | 4.6         | <1.61↓ | <1.61↓     | <1.61↓      |
| TNF-b           | <1.93↓      | <1.93↓      | <1.69↓      | <1.69↓ | <1.93↓      | <1.69↓     | <1.69↓      | <1.69↓      | <1.69↓      | <1.69↓ | <1.69↓     | <1.69↓      |
| VEGF            | 1503        | 4932        | 3272        | 137.71 | 751.98      | 2710       | >6506↑      | >6506↑      | >6506↑      | 135.94 | 2394       | 6305        |

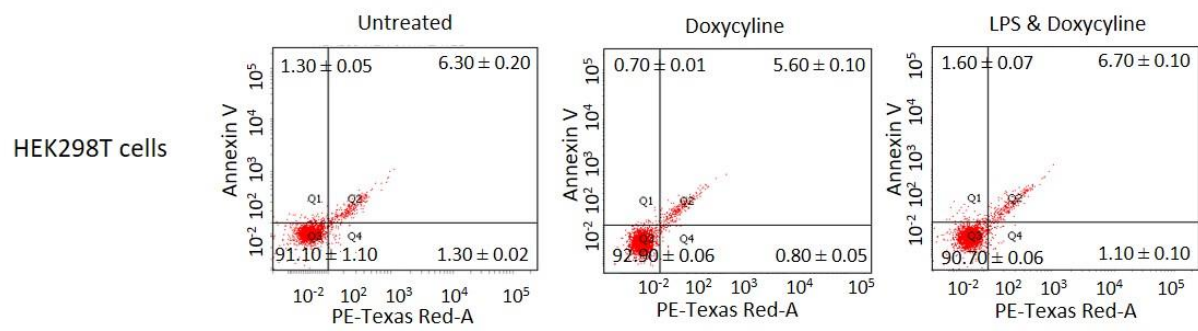

**Figure S1:** The effect of doxycycline on viability of non-tumor epithelial cells.

# The original images of western blots

A549-marker

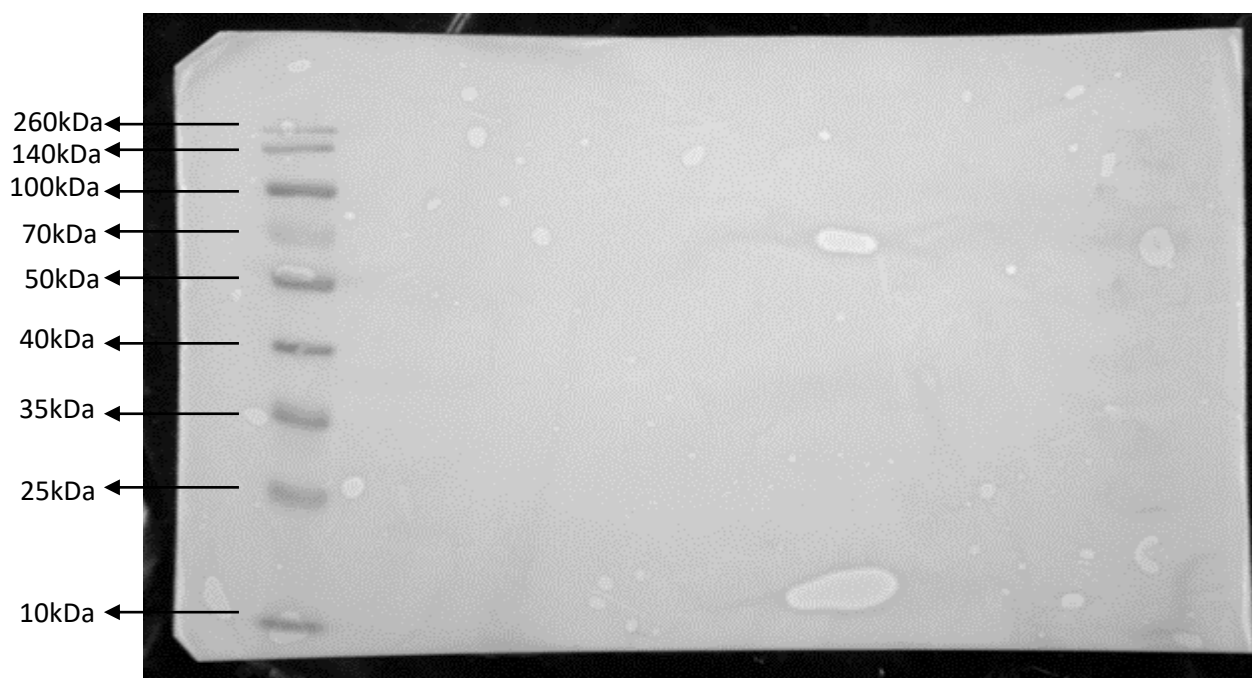

A549-Actb

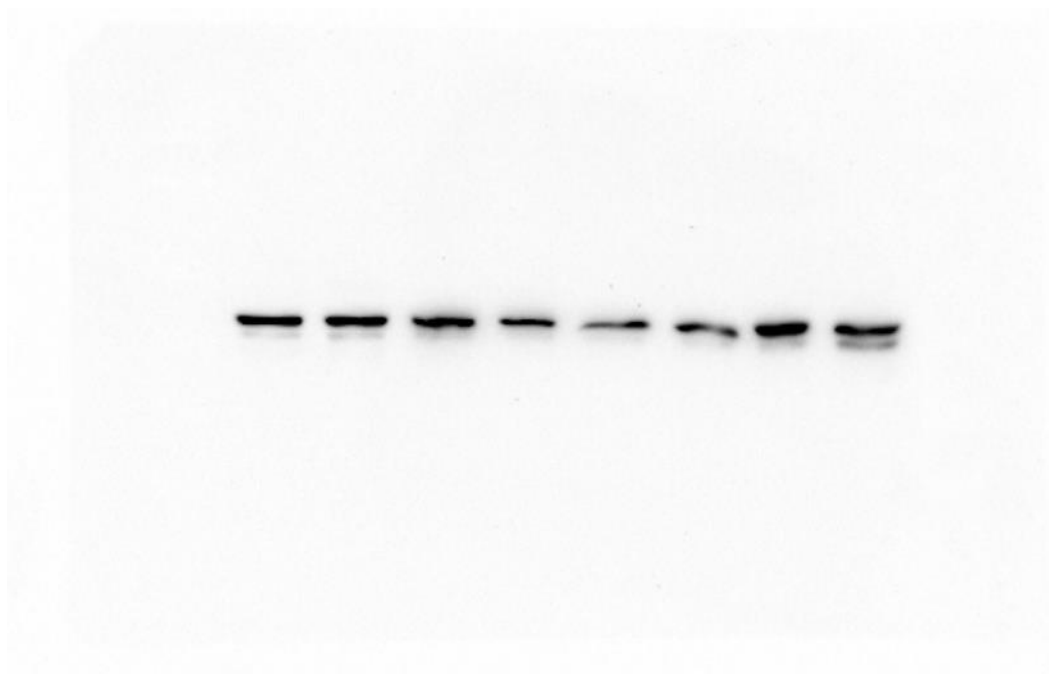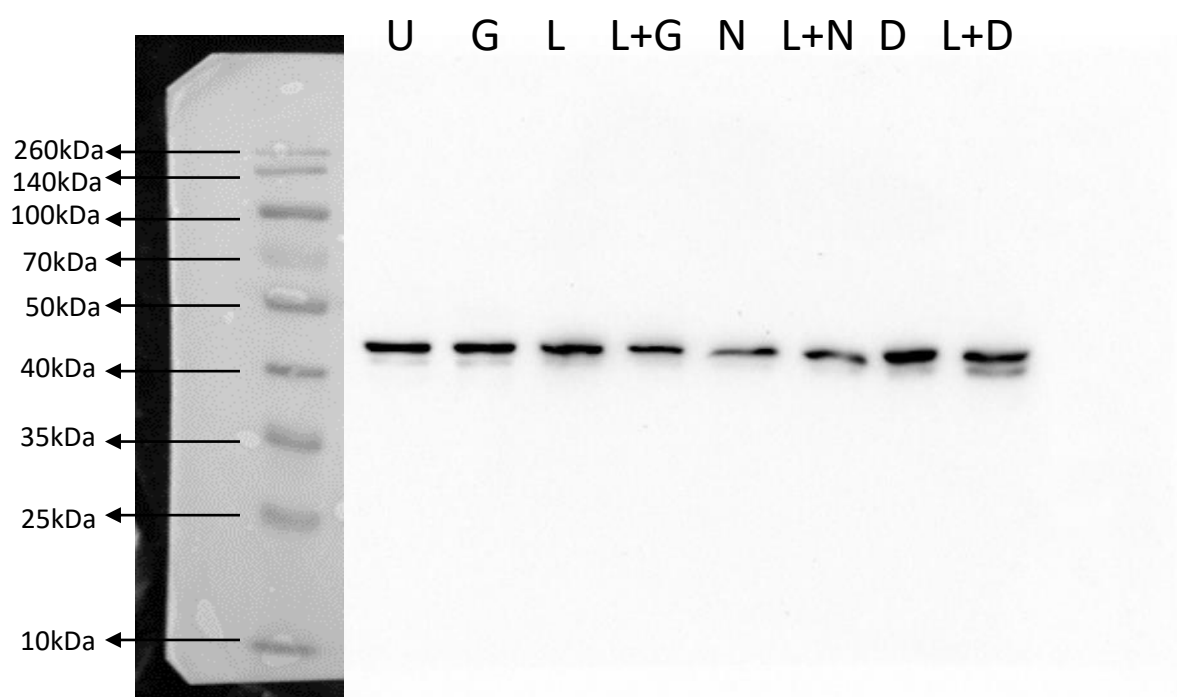



A549 NLRP3

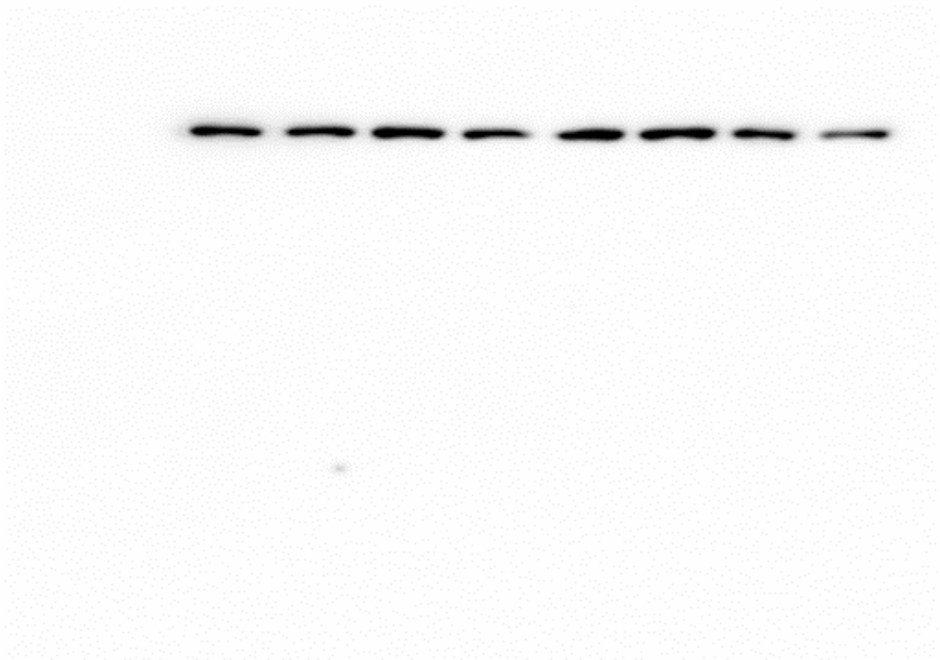

U    G    L    L+G    N    L+N    D    L+D

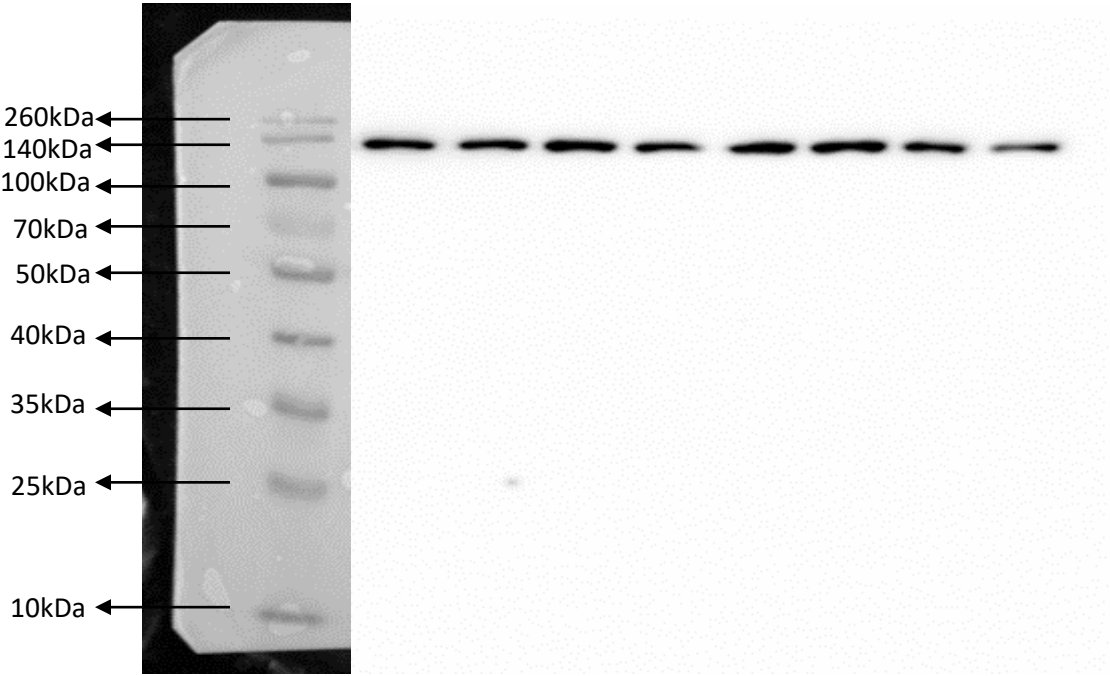

PC3 marker

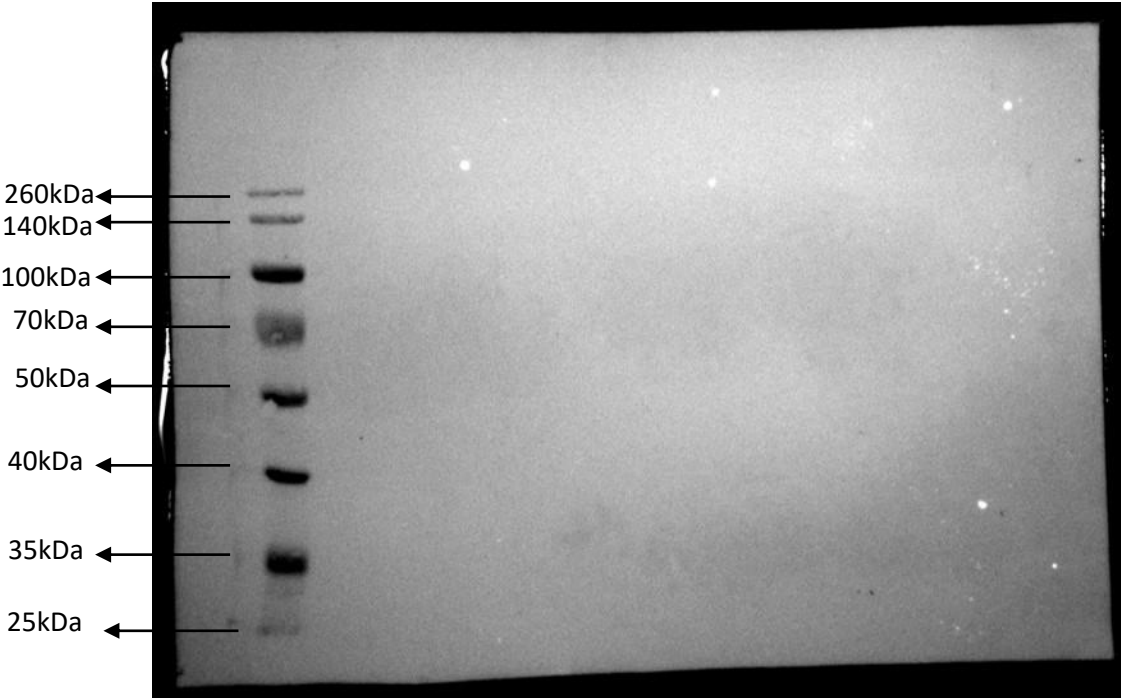

PC3 Actb

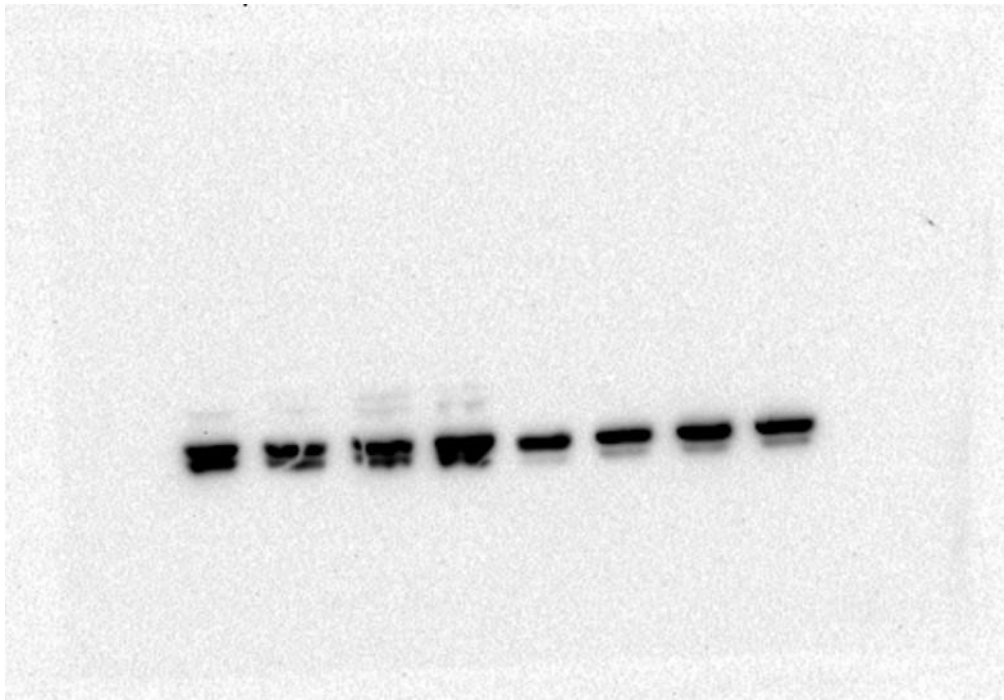

U G L L+G N L+N D L+D

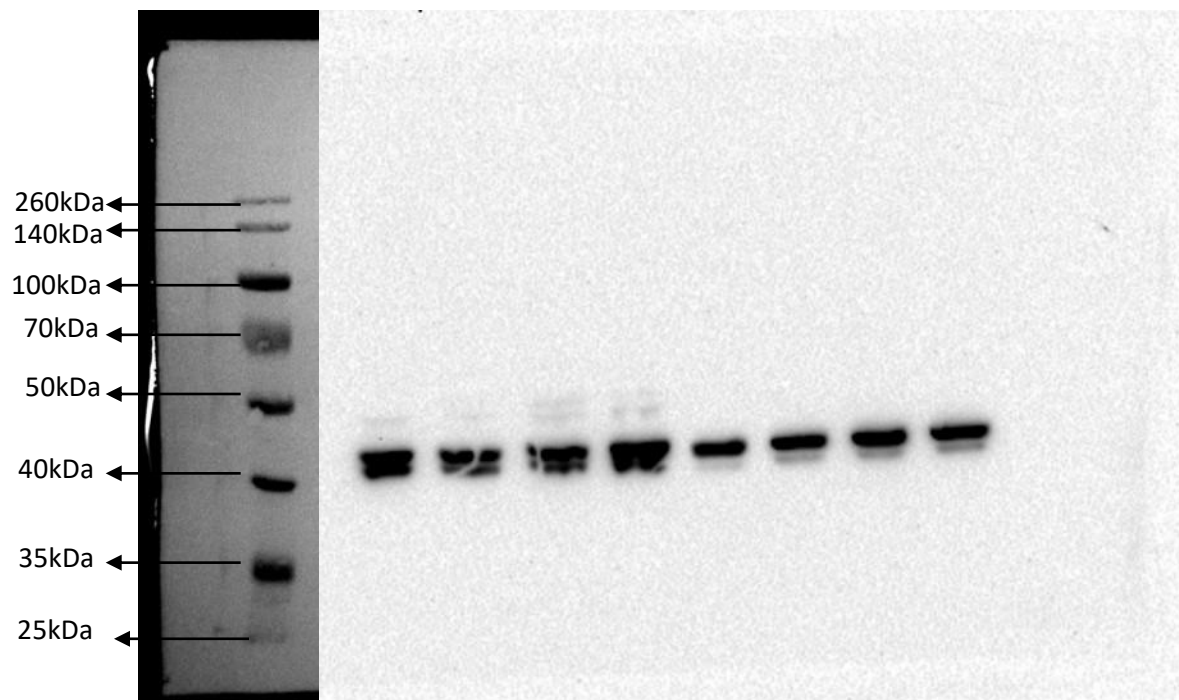

PC3 NLRP3

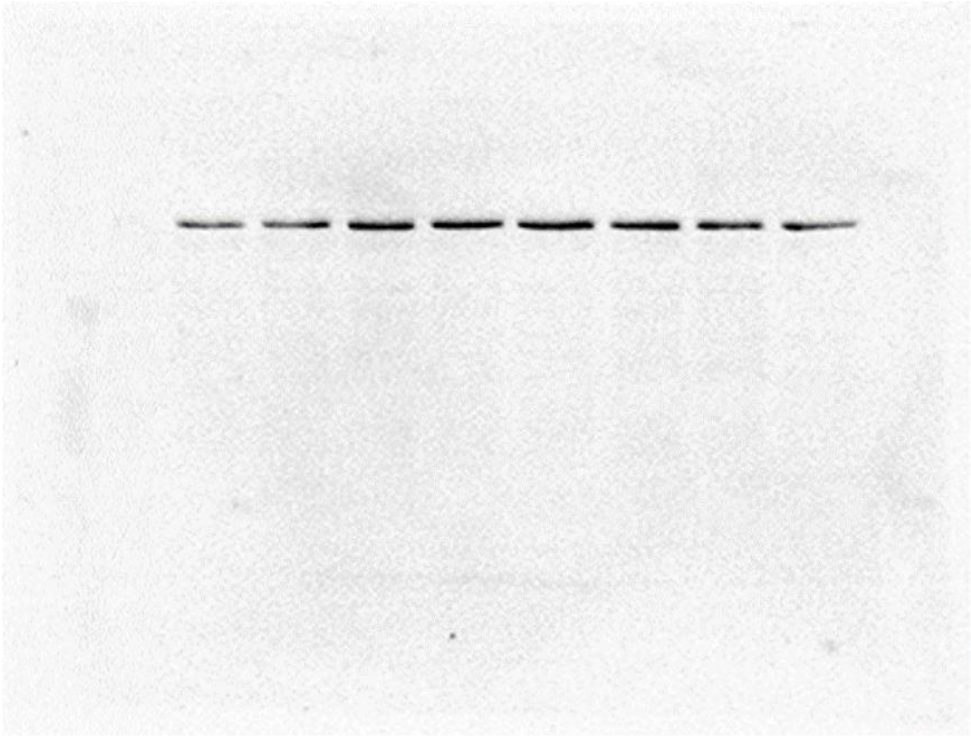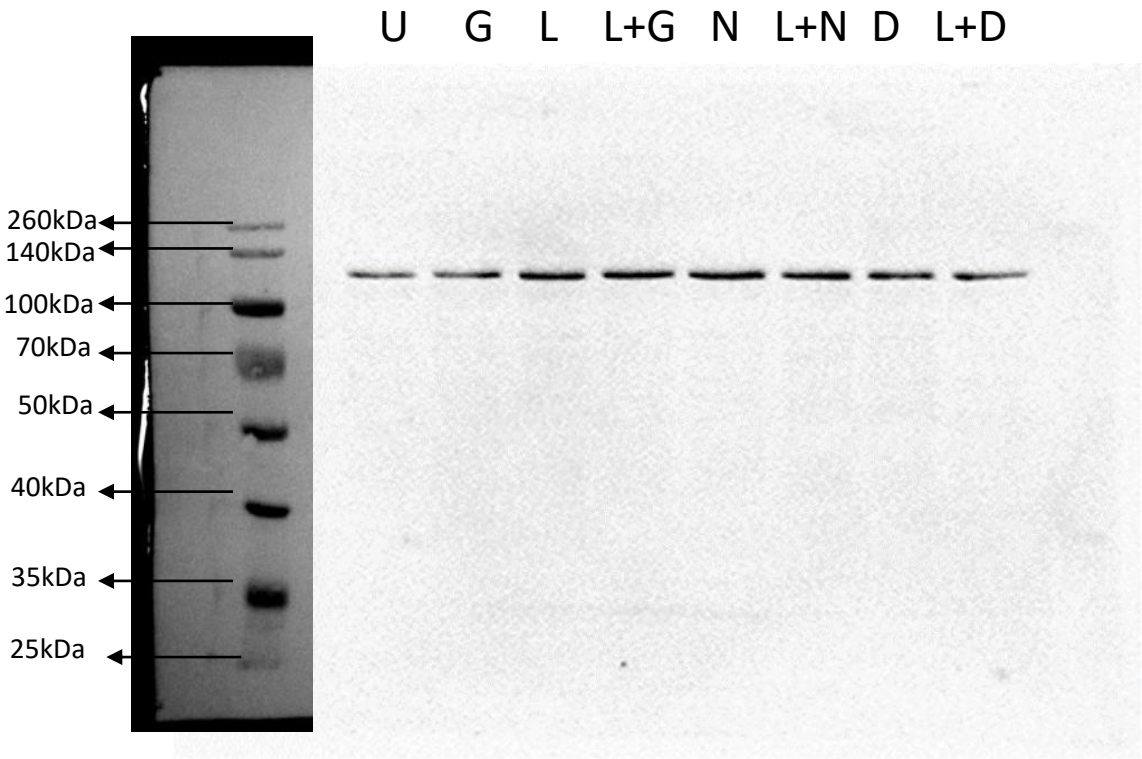

Supplement: s1 [file s1]
